# Supplementary material
Source: Springer Nature journal article supplement (https://www.springermedizin.de/resource/supplementary/13012_2011_482_MOESM7_ESM.pdf/9630076)

Mean silhouette width

0.15  
0.20  
0.25

5

10

15

Number of clusters

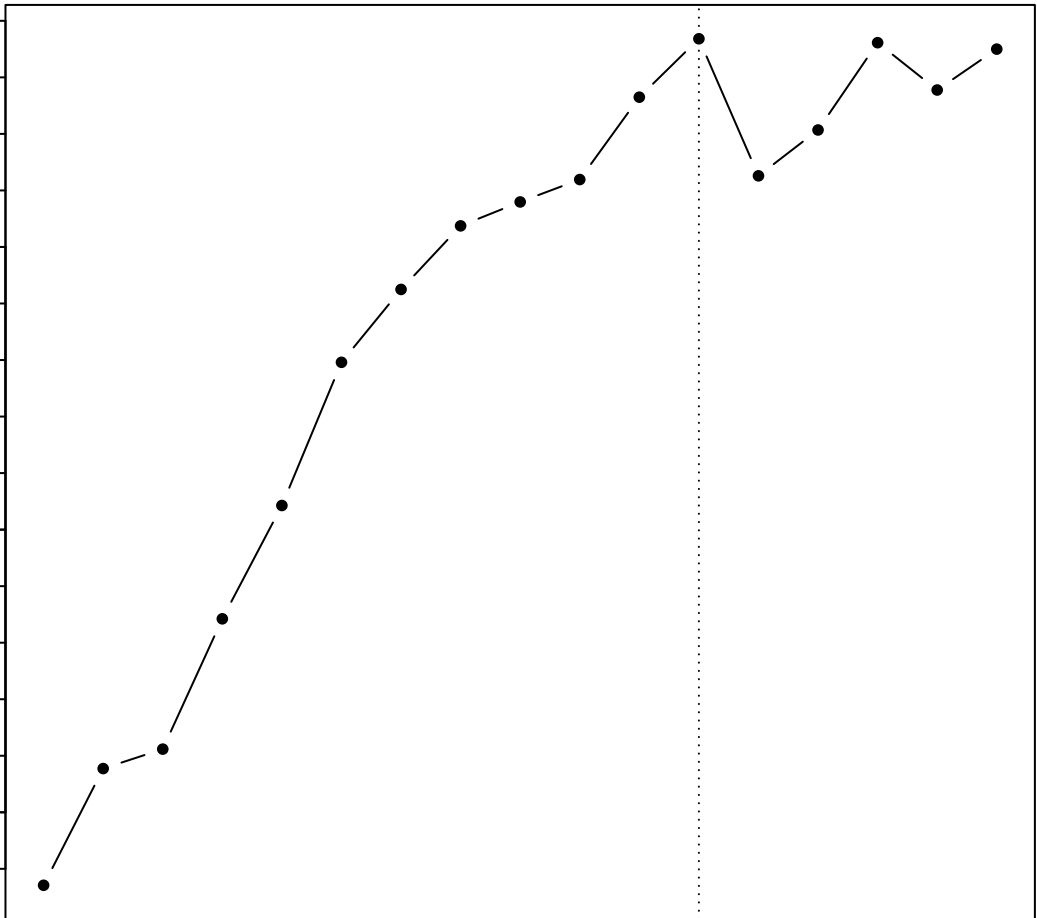

Supplement: MOESM7 [file 9630076]
